# Supplementary material for: Decorin (DCN) Downregulation Activates Breast Stromal Fibroblasts and Promotes Their Pro-Carcinogenic Effects through the IL-6/STAT3/AUF1 Signaling
Source: MDPI journal article supplement (doi:10.3390/cells13080680), 2024-04-14
Supplement: s1 [file s1]

**Supplementary Table S1.** List of primers

| Primers                        | Sequence       |                                         |
|--------------------------------|----------------|-----------------------------------------|
| <i>GAPDH</i>                   | <i>Forward</i> | 5'-GAGTCCACTGGCGTCTTC-3'                |
|                                | <i>Reverse</i> | 5'-GGGGTGCTAAGCAGTTGGT-3'               |
| <i>DCN</i>                     | <i>Forward</i> | 5'-TCA AAA GGT CAA GAT CAG CCC-3'       |
|                                | <i>Reverse</i> | 5'-CAC TAG CTT TGT GGG CAG TT-3'        |
| <i>ACTA2</i> ( $\alpha$ -SMA)  | <i>Forward</i> | 5'-CTATGCCTCTGGACGCACAACT -3'           |
|                                | <i>Reverse</i> | 5'-CAGATCCAGACGCATGATGGCA -3'           |
| <i>CXCL12</i> (SDF-1)          | <i>Forward</i> | 5'- CTCAACACTCCAAACTGTGCCC -3'          |
|                                | <i>Reverse</i> | 5'-CTCCAGGTACTCCTGAATCCAC-3'            |
| <i>TGF-<math>\beta</math>1</i> | <i>Forward</i> | 5'-TACCTGAACCCGTGTTGCTCTC -3'           |
|                                | <i>Reverse</i> | 5'-GTTGCTGAGGTATCGCCAGGAA -3'           |
| <i>IL-6</i>                    | <i>Forward</i> | 5'-AGACAG CCA CTC ACC TCT TCA G -3'     |
|                                | <i>Reverse</i> | 5'- TTC TGC CAG TGC CTC TTT GCT G -3'   |
| <i>IL-8</i>                    | <i>Forward</i> | 5'- GAT CCA CAA GTC CTT GTT CCA -3'     |
|                                | <i>Reverse</i> | 5'- GCT TCC ACA TGT CCT CAC AA -3'      |
| <i>AUF-1</i>                   | <i>Forward</i> | 5'-GATCAAGGGGTTTTGGCTTT -3'             |
|                                | <i>Reverse</i> | 5'-GTTGTCCATGGGGACCTCTA-3'              |
| <i>FAP-<math>\alpha</math></i> | <i>Forward</i> | 5'-TGA CCA GAA CCA CGG CTT AT -3'       |
|                                | <i>Reverse</i> | 5'- AGC AAA CTG TCT GAG GGG TT          |
| <i>CDH1</i>                    | <i>Forward</i> | 5'-CCC GCC TTA TGA TTC TCT GCT CGT G-3' |
|                                | <i>Reverse</i> | 5'-TCC GTA CAT GTC AGC CAG CTT CTT G-3' |
| <i>CDH2</i>                    | <i>Forward</i> | 5'-CCT CCA GAG TTT ACT GCC ATG AC-3'    |
|                                | <i>Reverse</i> | 5'-GTA GGA TCT CCG CCA CTG ATT C-3'     |
| <i>ALDH1A1</i>                 | <i>Forward</i> | 5'-TCT CTA TTT CTC TCC CCT CCC T-3'     |
|                                | <i>Reverse</i> | 5'-ACC ATC TTT GAA GGG TTG GC-3'        |
| <i>VEGF-A</i>                  | <i>Forward</i> | 5'-CCCACTGAGGAGTCCAACAT-3'              |
|                                | <i>Reverse</i> | 5'-TGGATGGTGGTACAGTCAGAGC-3'            |
| <i>CD24</i>                    | <i>Forward</i> | 5'- GAGAGATAACCCTGCCCGAG-3'             |
|                                | <i>Reverse</i> | 5'- AAAAGAAAAGTCCGCGCCTC -3'            |
| <i>CD44</i>                    | <i>Forward</i> | 5'-CCA GAA GGA ACA GTG GTT TGG C-3'     |
|                                | <i>Reverse</i> | 5'-ACT GTC CTC TGG GCT TGG TGT T-3'     |

**Supplementary Table S2.** List of primary antibodies

| <b>Protein</b> | <b>Primary antibody</b>                    | <b>Molecular weight</b> | <b>Isotype (source)</b> | <b>Used concentration</b> | <b>Cat #</b> | <b>Company</b> |
|----------------|--------------------------------------------|-------------------------|-------------------------|---------------------------|--------------|----------------|
| P-16           | P16 (F-12)                                 | 16 kDa                  | Mouse IgG               | 1:1000                    | SC-1661      | Santa Cruz     |
| $\alpha$ -SMA  | pAb to alpha smooth muscle Actin           | 30,35,37 kDa            | Rabbit IgG              | 1:1000                    | Ab5694       | Abcam          |
| TGF- $\beta$   | mAb to TGF beta1 (2Ar2)                    | 50 kDa                  | Mouse IgG               | 1:1000                    | Ab64715      | Abcam          |
| FAP- $\alpha$  | pAb to fibroblast activation protein alpha | 100,130 kDa             | Rabbit IgG              | 1:1000                    | Ab53066      | Abcam          |
| SDF-1          | pAb to SDF1                                | 10-15                   | Rabbit IgG              | 1:1000                    | Ab9797       | Abcam          |
| DCN            | Anti-hDecorin Antibody                     | 37-45 kDa               | Mouse IgG               | 1:500                     | MAB 143      | R&D System     |
| IL-6           | Anti-interleukin-6 (IL-6) Antibody         | 21,26 kDa               | Rabbit IgG              | 1:1000                    | 701028       | Invitrogen     |
| Twist-1        | Anti-Twist-1 antibody [10E4E6]             | 21 kDa                  | Mouse IgG               | 1:500                     | ab175430     | Abcam          |
| p-STAT-3       | Phospho-STAT3(Y70) (D3A7) Antibody         | 79, 86 kDa              | Rabbit IgG              | 1:1000                    | 9145S        | Cell Signaling |
| STAT-3         | STAT-3 (124H6)                             | 79, 86 kDa              | Mouse IgG               | 1:1000                    | 9139S        | Cell Signaling |
| N-cadherin     | N-cadherin Antibody (13A9)                 | 110-140 kDa             | Mouse IgG               | 1:500                     | 14215S       | Cell Signaling |

|             |                                  |             |            |        |               |                         |
|-------------|----------------------------------|-------------|------------|--------|---------------|-------------------------|
| E-cadherin  | E-cadherin Antibody (4A2)        | 110-140 kDa | Mouse IgG  | 1:1000 | 14472s        | Cell Signaling          |
| Vimentin    | mAb to vimentin (RV202) antibody | 57,59 kDa   | Mouse IgG  | 1:1000 | Ab8978        | Abcam                   |
| VEGF-A      | Anti-VEGF antibody               | 45-52 kDa   | Rabbit IgG | 1:500  | ab46154       | Abcam                   |
| mTOR        | mTOR (7C10) Antibody             | 250 kDa     | Rabbit IgG | 1:1000 | 2983S         | Cell Signaling          |
| pmTOR       | P-mTOR (S2448) Antibody          | 250 kDa     | Rabbit IgG | 1:1000 | 2971S         | Cell Signaling          |
| AKT         | AKT1 (C73H10) Antibody           | 50-60 kDa   | Rabbit IgG | 1:1000 | 2938S         | Cell Signaling          |
| p-AKT       | p-AKT1 (T308) antibody           | 50-60 kDa   | Rabbit IgG | 1:1000 | 9275s         | Cell Signaling          |
| HIF-1 Alpha | HIF-1 Alpha antibody             | 120 kDa     | Rabbit IgG | 1:1000 | 3716S         | Cell Signaling          |
| IL-8        | IL-8 (21-99) Antibody            | 26 kDa      | Mouse IgG  | 1:1000 | H00003576-M01 | Abnova (Taipei, Taiwan) |
| AUF-1       | Anti-AUF-1 Antibody              | 37-45 kDa   | Rabbit IgG | 1:1000 | 2605378       | Millipore               |
| P-JAK-2     | P-JAK2 (Y1007/1008) Antibody     | 60-65 kDa   | Rabbit IgG | 1:1000 | 3771S         | Cell Signaling          |

|                     |                                                 |            |            |        |               |                   |
|---------------------|-------------------------------------------------|------------|------------|--------|---------------|-------------------|
| JAK-2               | mAb to JAK2<br>(E132)<br>Antibody               | 55-65 kDa  | Rabbit IgG | 1:1000 | Ab32101       | Abcam             |
| p-NF <sub>κ</sub> B | p-NF <sub>κ</sub> B<br>p65(Ser 536)<br>Sc-33020 | 65 kDa     | Rabbit IgG | 1:1000 | G1813         | Santa Cruz        |
| NF <sub>κ</sub> B   | NF <sub>κ</sub> B p65(F-6)<br>Sc-8008           | 65 kDa     | Mouse IgG  | 1:1000 | G2111         | Santa Cruz        |
| β-actin             | Beta-Actin                                      | 42 kDa     | Rabbit IgG | 1:1000 | 4967L         | Cell<br>Signaling |
| CD-44               | SAB 4300691<br>Anti-CD44<br>antibody            | 75-100 kDa | Rabbit IgG | 1:1000 | 87152147<br>1 | Sigma             |
| CD-24               | CD24 (SN3)<br>sc-19585<br>Antibody              | 35-55 kDa  | Mouse IgG  | 1:1000 | B2117         | Santa Cruz        |
| ALDH-1              | Anti-ALDH<br>Antibody                           | 50-52 kDa  | Mouse IgG  | 1:1000 | 8178547       | BD                |
| EpCAM               | EpCAM<br>(D1B3)<br>Antibody                     | 40 kDa     | Rabbit IgG | 1:1000 | 2626S         | Cell<br>signaling |
| Snail               | Snail (C15D3)<br>Antibody                       | 29 kDa     | Mouse IgG  | 1:1000 | 3879          | Cell<br>signaling |
| GAPDH               | GAPDH<br>(14C10)                                | 35,37 kDa  | Rabbit IgG | 1:1000 | 2118s         | Cell<br>Signaling |

**Supplementary Table S3.** List of secondary antibodies

| <b>Source of primary antibody</b> | <b>Secondary antibody</b>     | <b>Used concentration</b> | <b>Cat #</b> | <b>Company</b>   |
|-----------------------------------|-------------------------------|---------------------------|--------------|------------------|
| Rabbit                            | Anti-rabbit IgG-HRP conjugate | 1:10,000                  | (REF W4018)  | Promega, WI, USA |
| Mouse                             | Anti-mouse IgG-HRP conjugate  | 1.5:10,000                | (REF W4028)  |                  |

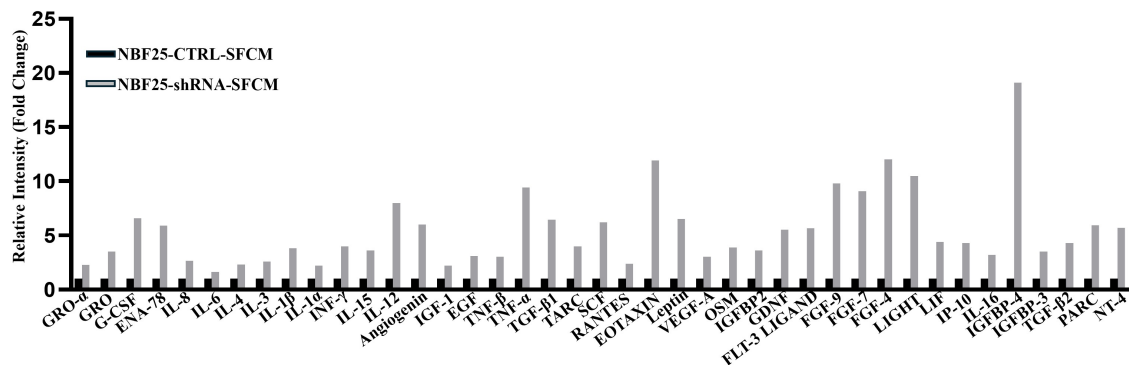

**Supplementary Figure S1.** Decorin downregulation in breast stromal fibroblasts enhances the secretion of several cytokines

SFCM from the NBF25-CTRL and NBF-25-shRNA cells were applied onto the human cytokine antibody array membrane (C5). The intensities of the spots in the NBF25-shRNA-SFCM cytokine array membrane were quantified by densitometric analysis and divided by the values obtained in the control for each protein and were presented as fold change.

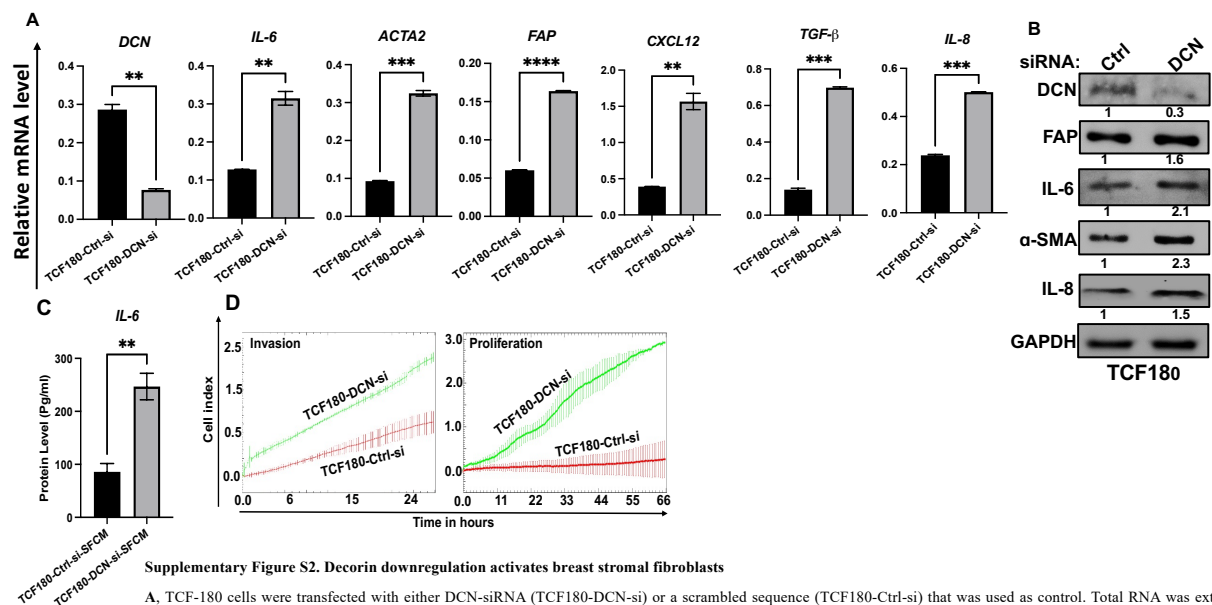

**Supplementary Figure S2.** Decorin downregulation activates breast stromal fibroblasts

**A**, TCF180 cells were transfected with either DCN-siRNA (TCF180-DCN-si) or a scrambled sequence (TCF180-CTRL-si) that was used as control. Total RNA was extracted and the mRNA levels of the indicated genes were assessed using qRT-PCR. Error bars represent mean $\pm$ S.D (n=3). \*\*P  $\leq$  0.01; \*\*\*P  $\leq$  0.001; \*\*\*\*P  $\leq$  0.0001. **B**, Whole-cell lysates were prepared from the indicated cells, and then were used for immunoblotting analysis using specific antibodies against the indicated proteins. **C**, SFCM from the indicated cells were collected after 24 h and the levels of the indicated protein were determined by ELISA. Error bars indicate mean $\pm$ S.D (n=3). \*\*P  $\leq$  0.01. **D**, exponentially growing cells were seeded, and cell invasion, and proliferation were assessed using the RTCA-DP xCELLigence System. Data are representative of different experiments performed in triplicate.

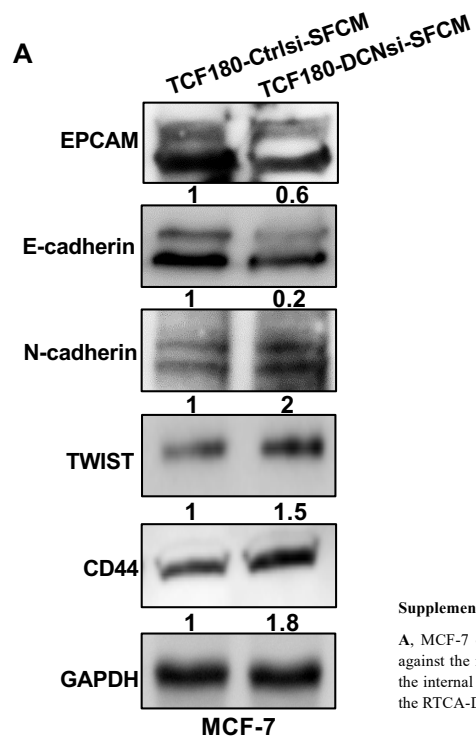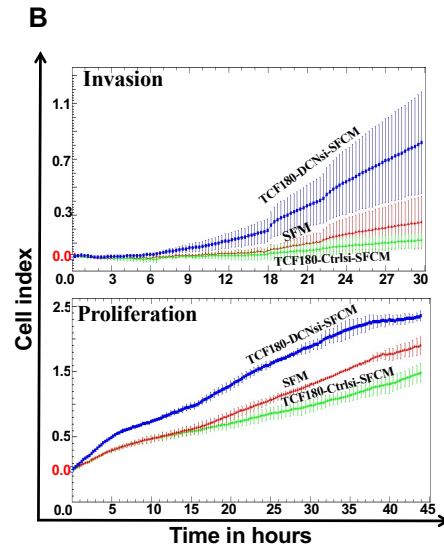

Supplementary Figure S3. Decorin down-regulation enhances the procarcinogenic effects of tumor counterpart fibroblasts

A, MCF-7 cells were treated as indicated and whole cell lysates were prepared for immunoblotting analysis using antibodies against the indicated proteins. The numbers below the bands represent fold change relative to the control after correction against the internal control GAPDH. B, exponentially growing cells were seeded, and cell invasion, and proliferation were assessed using the RTCA-DP xCELLigence System. Data are representative of different experiments performed in triplicate.
